# Supplementary material for: Prevalence of the Absence of Cirrhosis in Subjects with NAFLD-Associated Hepatocellular Carcinoma
Source: MDPI journal article supplement (doi:10.3390/jcm10204638), 2021-10-09
Supplement: s1 [file s1]

**Table S1. Criteria for the diagnosis of NAFLD/NASH, HCC and cirrhosis.**

| First Author, year           | Target condition <sup>a</sup> | Diagnostic criteria for steatosis                                                                    | Diagnostic criteria for NAFLD                                                                                                                                            | Reference standard for HCC                                                    | Reference standard for cirrhosis                                                               |
|------------------------------|-------------------------------|------------------------------------------------------------------------------------------------------|--------------------------------------------------------------------------------------------------------------------------------------------------------------------------|-------------------------------------------------------------------------------|------------------------------------------------------------------------------------------------|
| Ahn, 2020 [10]               | NAFLD                         | histology or radiology (US, CT)                                                                      | HBV, HCV, alcohol, medications, hereditary liver disorders                                                                                                               | histology or radiology according to 2018 AASLD                                | histology, radiology, biochemistry, endoscopy                                                  |
| Amaddeo, 2021 [11]           | NASH                          | -                                                                                                    | -                                                                                                                                                                        | histology or radiology according to 2018 EASL                                 | -                                                                                              |
| Bengtsson, 2019 [12]         | NAFLD                         | histology or radiology, BMI $\geq$ 25 kg/m <sup>2</sup> and T2DM, or BMI $\geq$ 30 kg/m <sup>2</sup> | HBV, HCV, alcohol, autoimmune liver disease, hemochromatosis, alpha-1 antitrypsin deficiency and other possible causes of liver disease                                  | histology or radiology (US, MRI, CT) according to 2018 EASL                   | histology, radiology, endoscopy                                                                |
| Benhammou, 2020 [13]         | NAFLD                         | -                                                                                                    | HBV, HCV, alcohol, autoimmune liver disease, alpha-1 anti-trypsin, Wilson disease and hemochromatosis                                                                    | histology or radiology (MRI, CT) according to 2018 EASL                       | histology, radiology, biochemistry, endoscopy                                                  |
| Best, 2020 [14] <sup>b</sup> | NASH                          | histology or metabolic syndrome                                                                      | HBV, HCV, alcohol, other possible causes of liver disease                                                                                                                | histology or radiology (MRI, CT) according to 2012 EASL                       | histology or by overt clinical findings as portal hypertension in known chronic liver diseases |
| Billeter, 2020 [15]          | NASH                          | histology                                                                                            | HBV, HCV, alcohol, hemochromatosis, Wilson disease, or other rare diseases                                                                                               | histology                                                                     | histology                                                                                      |
| Canbay, 2020 [16]            | NAFLD                         | diagnosis-specific claims                                                                            | HAV, HBV, HCV, HDV, HEV, HIV, alcohol, autoimmune liver disease, toxic liver disease, Wilson disease, Gaucher disease, lysosomal acid lipase deficiency, hemochromatosis | diagnosis-specific claims                                                     | diagnosis-specific claims                                                                      |
| Cotrim, 2016 [17]            | NAFLD                         | risk factors for NAFLD or metabolic syndrome                                                         | HBV, HCV, alcohol, hemochromatosis, and autoimmune liver disease                                                                                                         | histology                                                                     | histology                                                                                      |
| Debes, 2017 [18]             | NAFLD                         | -                                                                                                    | HCV, HBV, alcohol, hemochromatosis, autoimmune liver disease, schistosomiasis, medications, and vascular forma                                                           | histology or radiology according to 2012 AASLD, 2012 EASL-EORTC or 2014 LAASL | -                                                                                              |
| Dyson, 2014 [19]             | NAFLD                         | histology or radiology                                                                               | negative liver screen and alcohol intake                                                                                                                                 | histology or radiology (MRI, CT)                                              | histology or radiology                                                                         |
| Gawrieh, 2019 [20]           | NAFLD                         | clinical, histology or radiology                                                                     | HBV, HCV, alcohol, autoimmune liver disease, haemochromatosis and alpha-1-antitrypsin deficiency                                                                         | histology or radiology according to 2018 AASLD                                | histology, radiology, clinical, biochemistry                                                   |
| Hester, 2019 [21]            | NASH                          | histology or radiology                                                                               | HBV, HCV, alcohol, and other liver diseases                                                                                                                              | histology or radiology according to 2018 AASLD                                | histology, radiology, clinical, biochemistry                                                   |
| Kanwal, 2018 [22]            | NAFLD                         | 2 or more elevated ALT values and more than 6 months apart                                           | HBV, HCV, alcohol, autoimmune liver disease, hemochromatosis, or a-1 antitrypsin disease                                                                                 | diagnosis-specific claims                                                     | diagnosis-specific claims                                                                      |
| Kodama, 2019 [23]            | NAFLD                         | histology                                                                                            | HBV, HCV, alcohol, autoimmune liver disease, medications, biliary obstruction, Wilson disease and hemochromatosis                                                        | histology or radiology (US, MRI, CT, selective hepatic arteriography)         | histology                                                                                      |
| Koh, 2019 [24]               | NAFLD                         | histology                                                                                            | HBV, HCV, alcohol, autoimmune liver disease                                                                                                                              | histology                                                                     | histology                                                                                      |

| First Author, year   | Target condition <sup>a</sup> | Diagnostic criteria for steatosis | Diagnostic criteria for NAFLD                                                                                                                                                                       | Reference standard for HCC                                            | Reference standard for cirrhosis              |
|----------------------|-------------------------------|-----------------------------------|-----------------------------------------------------------------------------------------------------------------------------------------------------------------------------------------------------|-----------------------------------------------------------------------|-----------------------------------------------|
| Leung, 2015 [25]     | NAFLD                         | histology or radiology            | HBV, HCV, alcohol, Wilson disease, haemochromatosis, autoimmune liver disease, alpha-1-antitrypsin deficiency, cystic fibrosis, other chronic biliary tract diseases and other hepatic malignancies | histology or radiology according to 2011 AASLD                        | histology or radiology                        |
| Liu, 2014 [26]       | NAFLD                         | histology or radiology            | -                                                                                                                                                                                                   | histology or radiology according to 2012 EASL-EORTC                   | histology                                     |
| Mohamad, 2015 [27]   | NAFLD                         | histology or radiology            | alcohol or confounding liver diseases                                                                                                                                                               | histology or radiology according to 2011 AASLD                        | histology or radiology                        |
| Pinero, 2018 [28]    | NAFLD                         | histology or radiology (US)       | HBV, HCV, alcohol, cryptogenic cirrhosis (CC), autoimmune liver disease, hemochromatosis, Wilson disease, toxic liver disease                                                                       | histology or radiology according to 2012 EASL-EORTC                   | histology, radiology, biochemistry, endoscopy |
| Piscaglia, 2016 [29] | NAFLD                         | radiology (US)                    | alcohol, other liver diseases                                                                                                                                                                       | histology or radiology according to 2012 EASL-EORTC                   | histology, radiology, biochemistry            |
| Sanyal, 2010 [30]    | NAFLD                         | diagnosis-specific claims         | diagnosis-specific claims                                                                                                                                                                           | diagnosis-specific claims                                             | diagnosis-specific claims                     |
| Tateishi, 2015 [31]  | NAFLD                         | histology or radiology            | HBV, HCV, alcohol, autoimmune liver disease, Budd-Chiari syndrome, hemochromatosis, Wilson disease, and other liver diseases                                                                        | histology or radiology (MRI, CT, angiography)                         | -                                             |
| Than, 2017 [32]      | NAFLD                         | histology or radiology            | HCV, alcohol                                                                                                                                                                                        | radiology (US, MRI)                                                   | histology or radiology                        |
| Tobari, 2020 [33]    | NAFLD                         | histology or radiology            | HBV, HCV, alcohol and other liver diseases                                                                                                                                                          | histology or radiology (US, MRI, CT, selective hepatic arteriography) | histology, radiology, endoscopy               |
| Tokushige, 2013 [34] | NAFLD                         | histology or radiology            | HBV, HCV, alcohol and other liver diseases                                                                                                                                                          | histology or radiology                                                | histology, radiology, biochemistry, endoscopy |
| van Meer, 2016 [35]  | NAFLD                         | histology or metabolic syndrome   | HBV, HCV, alcohol, hemochromatosis and other liver diseases                                                                                                                                         | histology or radiology according to 2011 AASLD                        | histology, radiology, biochemistry            |
| Wong, 2017 [36]      | NAFLD                         | diagnosis-specific claims         | diagnosis-specific claims                                                                                                                                                                           | diagnosis-specific claims                                             | diagnosis-specific claims                     |
| Yang, 2018 [37]      | NAFLD                         | radiology or metabolic syndrome   | HBV, HCV, HEV, alcohol, medications, autoimmune liver diseases, Wilson disease, alpha-1-antitrypsin deficiency, hemochromatosis, and Pompe's syndrome                                               | histology                                                             | histology                                     |
| Yasui, 2019 [38]     | NASH                          | histology                         | HBV, HCV, alcohol, autoimmune liver diseases, Wilson disease, or hemochromatosis, medications, gastrointestinal bypass surgery                                                                      | histology or radiology according to 2005 AASLD                        | histology                                     |
| Yoon, 2018 [39]      | NAFLD                         | histology or radiology            | HBV, HCV, alcohol, medications or hereditary disorders                                                                                                                                              | histology or radiology according to 2011 AASLD                        | radiology or clinical                         |
