# Supplementary material for: Prevalence of the Absence of Cirrhosis in Subjects with NAFLD-Associated Hepatocellular Carcinoma
Source: MDPI journal article supplement (doi:10.3390/jcm10204638), 2021-10-09

Figure S1. Funnel plot of meta-analysis on the absence of cirrhosis in subjects with NAFLD-associated HCC.

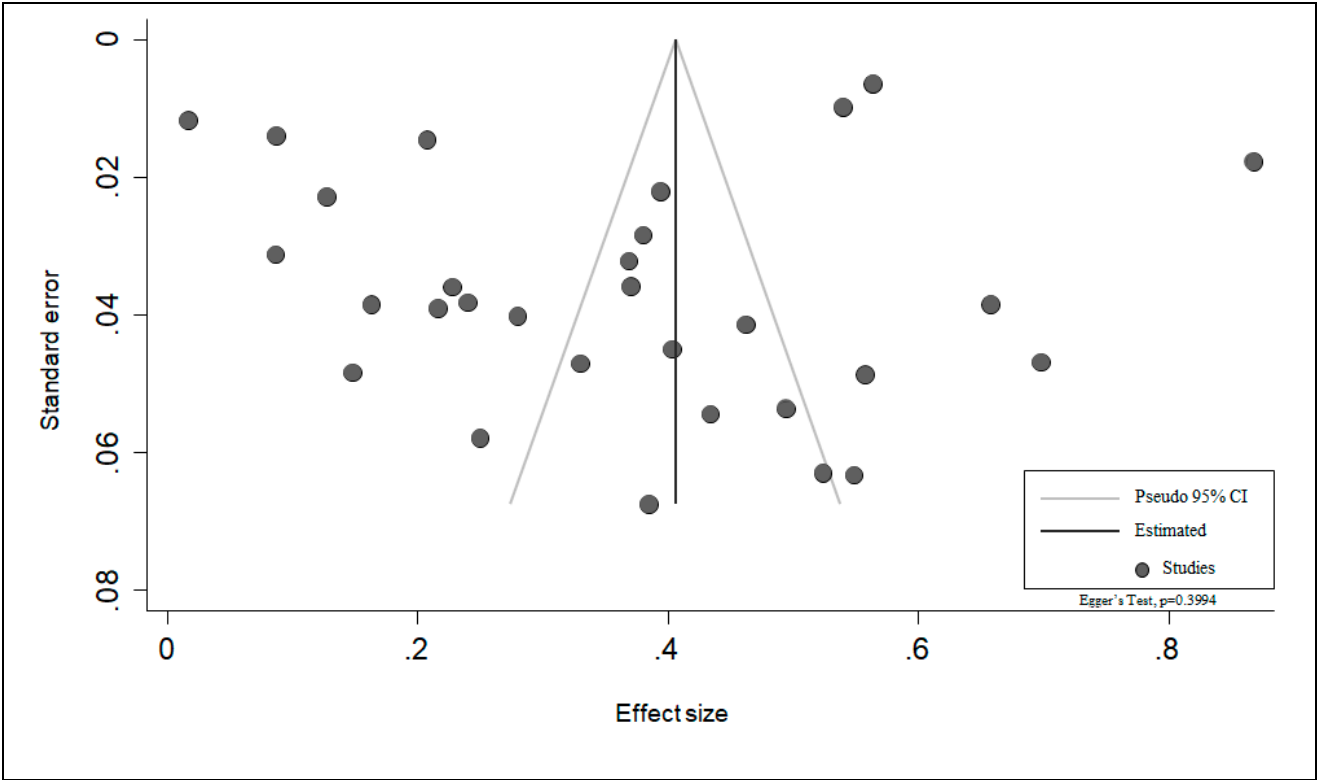

Supplement: s1 [file s1]
